# Supplementary material
Source: MDPI journal article supplement (https://www.mdpi.com/1999-4907/13/8/1299)
Supplement: s1 [file s1]

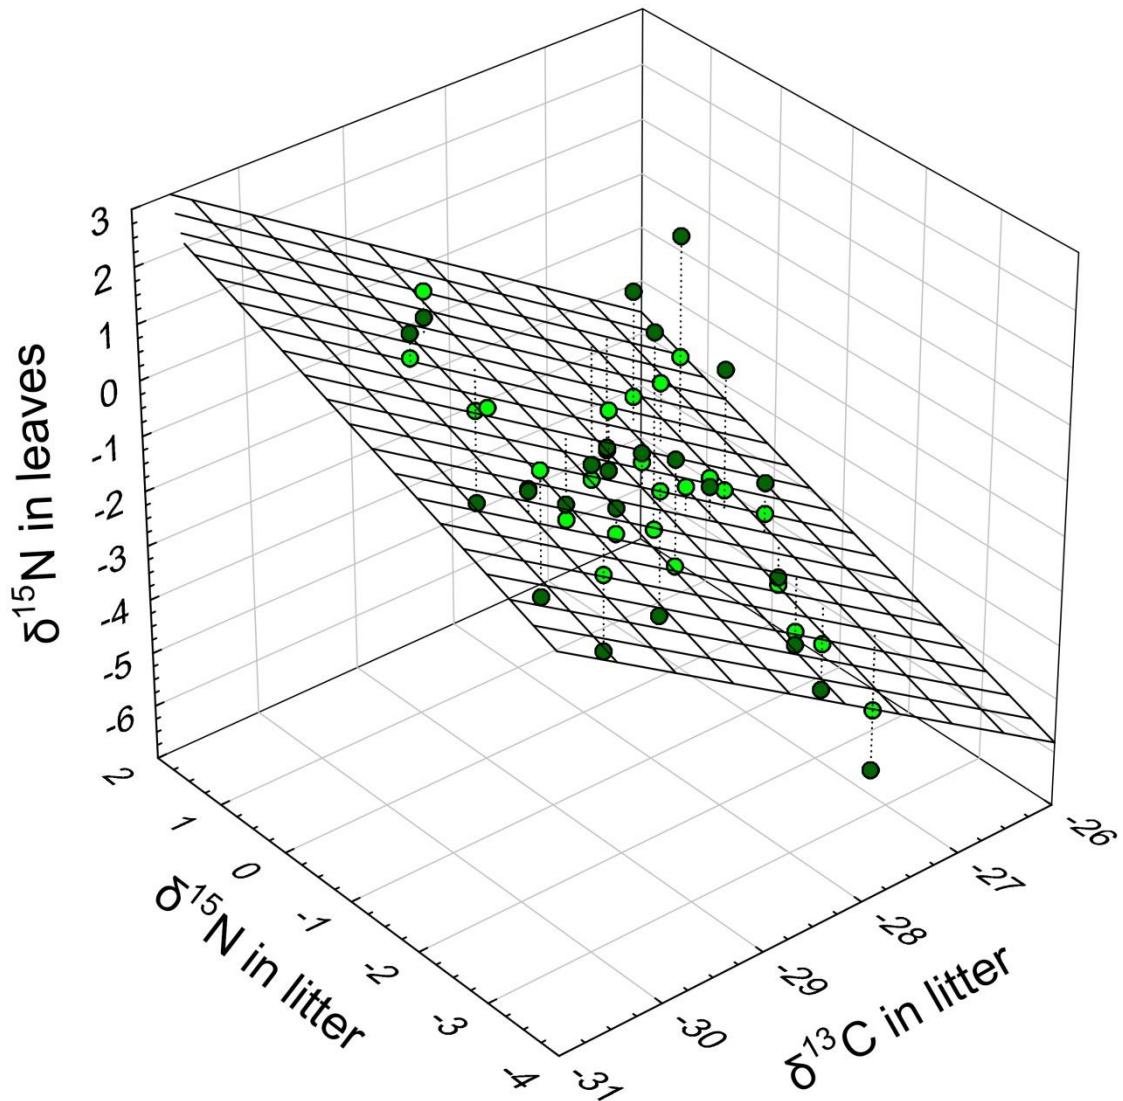

**Supplement – Figure S2.**  $\delta^{15}\text{N}$  in the leaves of *Betula* spp. (light green circles) and *Pinus sylvestris* (dark green circles) depending on the  $\delta^{15}\text{N}$  and  $\delta^{13}\text{C}$  in the litter.

**Table S1.**

| N  | Zone | Plot number | Distance from the KCS, km | Litter pollution index, times | Litter pollution index (Ln) | Litter thickness, cm | Root occurrence in litter | $\delta^{13}\text{C}$ Betula | $\delta^{15}\text{N}$ Betula | $\delta^{13}\text{C}$ Pinus | $\delta^{15}\text{N}$ Pinus | $\delta^{13}\text{C}$ litter | $\delta^{15}\text{N}$ litter | $\delta^{13}\text{C}$ humus | $\delta^{15}\text{N}$ humus |
|----|------|-------------|---------------------------|-------------------------------|-----------------------------|----------------------|---------------------------|------------------------------|------------------------------|-----------------------------|-----------------------------|------------------------------|------------------------------|-----------------------------|-----------------------------|
| 1  | ISR  | 31          | 37.20                     | 3.25                          | 1.18                        | 4.00                 | 1.00                      | -29.93                       | -4.33                        | -29.82                      | -4.05                       | -27.07                       | 1.22                         | -26.92                      | 2.06                        |
| 2  | ISR  | 37K         | 37.50                     | 1.96                          | 0.67                        | 5.45                 | 1.00                      | -30.32                       | -4.93                        | -29.59                      | -6.06                       | -27.23                       | -3.08                        | -25.26                      | -0.32                       |
| 3  | ISR  | 221\37      | 50.00                     | 1.18                          | 0.16                        | 2.60                 | 0.90                      | -31.26                       | -3.41                        | -29.78                      | -3.36                       | -27.16                       | 0.86                         | -26.91                      | 2.07                        |
| 4  | ISR  | 221\28      | 50.00                     | 1.09                          | 0.09                        | 3.55                 | 0.90                      | -30.75                       | -3.51                        | -29.46                      | -3.75                       | -27.68                       | -2.59                        | -26.06                      | -0.48                       |
| 5  | ISR  | 207\18      | 48.40                     | 1.29                          | 0.26                        | 5.50                 | 1.00                      | -31.02                       | -1.18                        | -29.54                      | -2.28                       | -27.92                       | -0.26                        | -26.27                      | 2.88                        |
| 6  | ISR  | 204\36      | 48.50                     | 1.41                          | 0.34                        | 3.50                 | 0.90                      | -31.23                       | -2.39                        | -29.92                      | -1.83                       | -27.34                       | -1.68                        | -25.80                      | 1.28                        |
| 7  | ISR  | 204\7       | 48.10                     | 1.59                          | 0.46                        | 3.70                 | 0.90                      | -29.86                       | -3.36                        | -29.62                      | -4.20                       | -27.71                       | -3.00                        | -24.88                      | 0.60                        |
| 8  | ISR  | 199\26      | 47.70                     | 1.67                          | 0.51                        | 5.55                 | 1.00                      | -30.57                       | -0.58                        | -29.74                      | -2.25                       | -29.02                       | 0.07                         | -26.57                      | 2.47                        |
| 9  | ISR  | 199\12      | 47.50                     | 1.67                          | 0.51                        | 3.96                 | 1.00                      | -31.11                       | -3.55                        | -29.69                      | -3.41                       | -27.33                       | -1.87                        | -25.18                      | -0.56                       |
| 10 | ISR  | 198\22      | 48.50                     | 1.49                          | 0.40                        | 6.90                 | 1.00                      | -31.48                       | -0.56                        | -28.69                      | 1.60                        | -27.31                       | -0.42                        | -26.13                      | 0.76                        |
| 11 | ISR  | 78\13       | 32.80                     | 2.28                          | 0.82                        | 3.10                 | 0.90                      | -28.91                       | -0.48                        |                             |                             | -27.72                       | -0.72                        | -26.40                      | 1.57                        |
| 12 | ISR  | 77\20       | 33.00                     | 3.09                          | 1.13                        | 2.40                 | 1.00                      | -29.93                       | -1.51                        |                             |                             | -28.01                       | -1.49                        | -26.23                      | -0.10                       |

|    |     |               |      |        |      |      |      |        |       |        |       |        |       |        |      |
|----|-----|---------------|------|--------|------|------|------|--------|-------|--------|-------|--------|-------|--------|------|
| 13 | KCS | <b>186\1</b>  | 6.60 | 55.57  | 4.02 | 3.90 | 0.90 | -30.07 | 1.71  | -29.72 | 1.24  | -29.40 | 0.23  | -25.16 | 2.19 |
| 14 | KCS | <b>186\4</b>  | 7.00 | 62.09  | 4.13 | 4.25 | 0.60 | -30.45 | -2.21 | -30.11 | -0.03 | -27.45 | -1.26 | -24.97 | 1.37 |
| 15 | KCS | <b>186\4K</b> | 7.00 | 107.19 | 4.67 | 3.90 | 0.60 | -30.70 | -2.46 | -29.42 | 1.08  | -28.11 | -1.18 | -25.65 | 2.01 |
| 16 | KCS | <b>186\16</b> | 7.10 | 51.90  | 3.95 | 2.85 | 0.25 | -28.73 | 1.47  | -30.95 | 1.90  | -29.96 | -0.43 | -25.36 | 1.26 |
| 17 | KCS | <b>186\31</b> | 6.40 | 109.18 | 4.69 | 5.90 | 0.40 | -30.77 | -1.43 | -31.47 | 0.47  | -27.51 | -0.03 | -25.37 | 2.35 |
| 18 | KCS | <b>186\35</b> | 6.50 | 116.78 | 4.76 | 9.50 | 0.40 | -30.89 | -2.26 | -28.92 | -0.34 | -28.42 | -1.92 | -25.14 | 0.78 |
| 19 | KCS | <b>186\37</b> | 6.10 | 159.11 | 5.07 | 8.60 | 0.25 | -33.28 | 0.20  | -31.53 | 0.16  | -29.80 | -1.85 | -25.82 | 1.09 |
| 20 | KCS | <b>185\39</b> | 5.60 | 111.06 | 4.71 | 2.65 | 0.55 | -30.30 | -0.07 |        |       | -29.18 | -0.35 | -26.21 | 2.40 |
| 21 | KCS | <b>175\57</b> | 8.80 | 33.02  | 3.50 | 3.30 | 0.75 | -31.77 | 0.16  | -29.57 | -2.09 | -29.55 | -1.65 | -26.05 | 1.89 |
| 22 | KCS | <b>175\56</b> | 8.60 | 67.95  | 4.22 | 5.30 | 0.85 | -31.30 | -0.80 | -29.36 | -0.64 | -28.40 | -1.42 | -24.84 | 1.19 |
| 23 | KCS | <b>175\40</b> | 8.60 | 50.69  | 3.93 | 5.00 | 0.95 | -31.43 | -1.91 | -31.04 | -1.63 | -28.81 | -0.93 | -25.12 | 2.13 |
| 24 | KCS | <b>175\39</b> | 8.50 | 32.79  | 3.49 | 3.45 | 0.80 | -31.29 | -1.43 | -31.01 | -3.71 | -28.24 | -1.45 | -25.66 | 1.38 |
| 25 | KCS | <b>175\37</b> | 9.10 | 49.90  | 3.91 | 2.80 | 0.95 | -32.14 | -1.78 | -30.16 | -1.32 | -28.71 | -1.50 | -26.42 | 1.69 |
| 26 | KCS | <b>166\50</b> | 9.10 | 16.70  | 2.82 | 3.75 | 1.00 | -32.58 | -1.09 | -29.56 | -2.46 | -29.48 | -2.43 | -24.74 | 0.62 |
| 27 | KCS | <b>166\49</b> | 9.50 | 40.45  | 3.70 | 6.20 | 1.00 | -30.98 | -1.31 | -28.53 | -1.47 | -27.89 | -1.66 | -25.76 | 1.71 |
